# Supplementary material for: Thermal and photochemical reactions of methanol on nanocrystalline anatase TiO2thin films
Source: Royal Society of Chemistry journal article supplement (doi:10.1039/c5cp02307f), 2015-01-01
Supplement: c5cp02307f1.pdf [file c5cp02307f1.pdf]

**Supplemental Information for**

**Thermal and photochemical reactions of methanol on  
nanocrystalline anatase TiO<sub>2</sub> thin films**

David A. Bennett<sup>1</sup>, Matteo Cargnello<sup>2,#</sup>, Thomas R. Gordon<sup>2</sup>,  
Christopher B. Murray<sup>2</sup>, and John M. Vohs<sup>1</sup>

<sup>1</sup>Department of Chemical and Biomolecular Engineering, <sup>2</sup>Department of Chemistry, <sup>3</sup>Department of Materials  
Science and Engineering University of Pennsylvania, Philadelphia, Pennsylvania 19104

<sup>#</sup>Present address: Department of Chemical Engineering, Stanford University, Stanford, California 94305

## Additional XPS Results

XPS was used to characterize the TiO<sub>2</sub> thin film samples before and after the oxygen annealing treatment that was used for sample cleaning. Figures S1 (F(1s) spectra) and S2 (C(1s) spectra) show that the cleaning procedure was effective in removing both F and C from the surfaces of the TiO<sub>2</sub> nanocrystals.

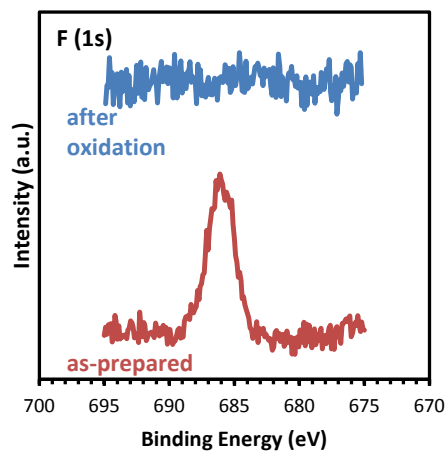

Figure S1. F(1s) XPS spectrum of as-prepared 18 nm A-TiO<sub>2</sub> thin film sample and following oxidation treatment.

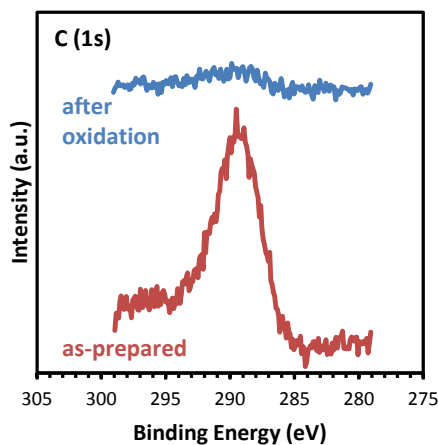

Figure S2. C(1s) XPS spectrum of as-prepared 18 nm A-TiO<sub>2</sub> thin film sample and following oxidation treatment.
